# Supplementary material for: Real-time observation of the Woodward–Hoffmann rule for 1,3-cyclohexadiene by femtosecond soft X-ray transient absorption
Source: Royal Society of Chemistry journal article supplement (doi:10.1039/d2cp05268g), 2023-01-01
Supplement: d2cp05268g1.pdf [file d2cp05268g1.pdf]

## Supplementary Information

Real-time observation of the Woodward-Hoffmann rule for 1,3-cyclohexadiene by  
femtosecond soft X-ray transient absorption

*Taro Sekikawa,<sup>1\*</sup> Nariyuki Saito,<sup>2</sup> Yutaro Kurimoto,<sup>1</sup> Nobuhisa Ishii,<sup>3</sup> Tomoya Mizuno,<sup>2</sup> Teruto  
Kanai,<sup>2</sup> Jiro Itatani,<sup>2</sup> Kenichiro Saita,<sup>4</sup> and Tetsuya Taketsugu<sup>4,5</sup>*

<sup>1</sup> Department of Applied Physics, Hokkaido University, Sapporo 060-8628, Japan

<sup>2</sup> Institute for Solid State Physics, University of Tokyo, Kashiwa 277-8581, Japan

<sup>3</sup> Kansai Photon Science Institute, National Institutes for Quantum and Radiological Science and  
Technology, Kizugawa 619-0215, Japan.

<sup>4</sup> Department of Chemistry, Faculty of Science, Hokkaido University, Sapporo 060-0810, Japan

<sup>5</sup> Institute for Chemical Reaction Design and Discovery (WPI-ICReDD), Hokkaido University,  
Sapporo 001-0021, Japan

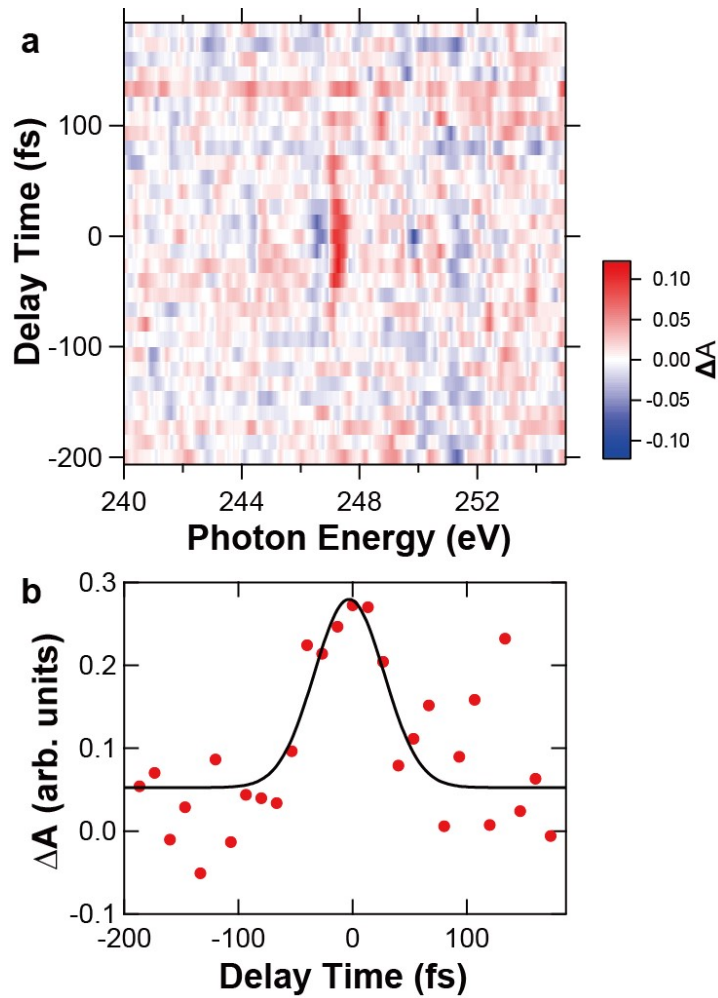

**Fig. S1.** Cross-correlation measurement between the pump and probe pulses by the AC Stark shift of Ar atoms. (a) Spectrogram of the AC Stark shift of the  $2p_{3/2} \rightarrow 3d$  absorption line. (b) Temporal evolution of the absorbance change at 247.3 eV. The solid line is the fitting result to the Gaussian function.

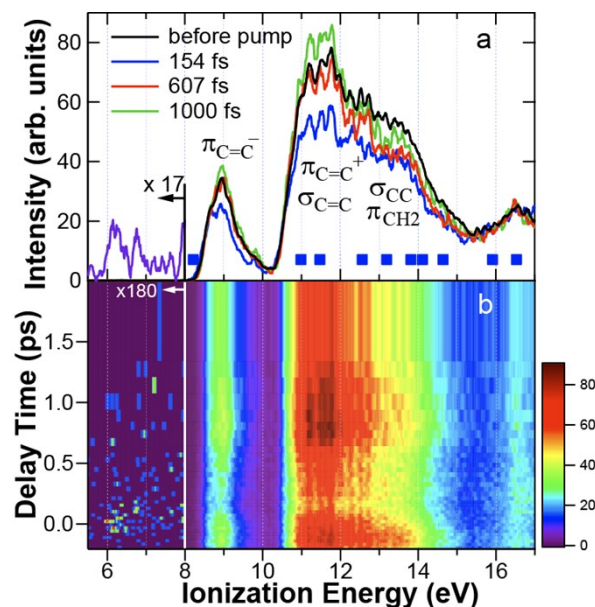

**Fig. S2.** Time-resolved photoelectron spectra of CHD. a) Photoelectron spectrum before pump (black) and the spectra at 154 fs (blue), 607 fs (red), and 1000 fs (green). The solid squares indicate the theoretical ionization energies of 1,3-cyclohexadiene. The spectrum of the excited states integrated between  $-140$  and  $250$  fs is shown by the purple line below  $8$  eV. b) Photoelectron spectrogram between  $-0.2$  and  $2$  ps. (Replot of Fig. 4 in ref 18 with permission from the Royal Society of Chemistry.)

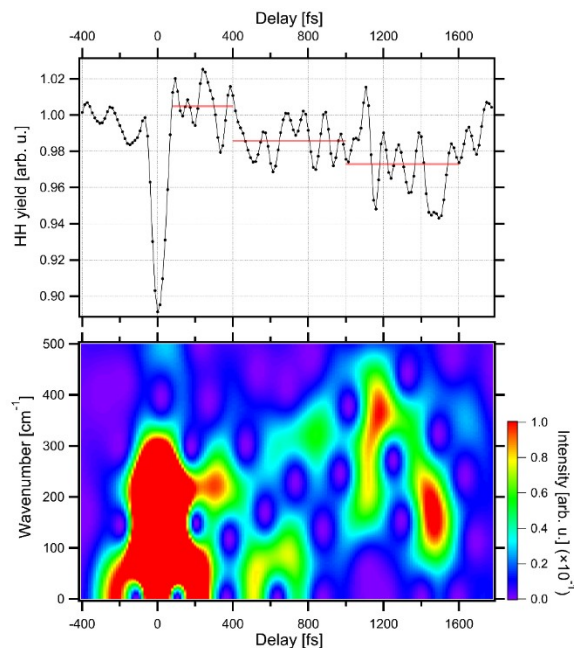

**Fig. S3.** (a) Experimentally observed yield of the 19th harmonic [identical to Fig. 4b]. The horizontal red lines show the average values of the data points (black dots) within the range of the length of each red line. (b) Short-time Fourier spectra of the transient harmonic yield [black dots in (a)]. (Replot of Fig. 5 in ref 21 with permission from the Optical Society of America)

**Table S1.** Cartesian coordinates (in Å) of the key structures, **CHD**, **TS1**, **cZc-HT**, **cZt-HT**, and **tZt-HT**, in the disrotatory reaction pathway. **TS1** is the disrotatory transition state which connects two equilibrium structures **CHD** and **cZc-HT** by the intrinsic reaction coordinate (IRC). The IRC was computed at B3LYP-D3/cc-pVDZ level of theory.

**CHD:**  $E(S_0) = -233.438398888499$  hartree,  $\langle S^2 \rangle = 0.000000000000$

| Atom | x               | y               | z               |
|------|-----------------|-----------------|-----------------|
| C    | 1.204414024748  | 0.194063030519  | -0.795001942760 |
| C    | 0.066301788867  | -0.328763702087 | 0.051865495176  |
| C    | 0.068947775583  | -0.132010412223 | 1.383878870708  |
| C    | 1.191323142311  | 0.554997807423  | 2.035690776124  |
| C    | 2.354470252371  | 0.738998442708  | 1.382856986293  |
| C    | 2.531273675124  | 0.201871271723  | -0.019310412057 |
| H    | 1.308569851191  | -0.391655858665 | -1.722267313817 |
| H    | 0.953460302793  | 1.228668116528  | -1.110039101804 |
| H    | -0.784935404725 | -0.807039799239 | -0.440925333082 |
| H    | -0.773834193372 | -0.460419621452 | 1.998358738512  |
| H    | 1.071093441695  | 0.894084751561  | 3.068294957220  |
| H    | 3.204095652649  | 1.217332291473  | 1.878358104099  |
| H    | 2.923233917141  | -0.834253806763 | 0.054601915469  |
| H    | 3.291417802334  | 0.778256285704  | -0.570419604690 |

**TS1:**  $E(S_0) = -233.368601278395$  hartree,  $\langle S^2 \rangle = 0.000000000000$

| Atom | x               | y               | z               |
|------|-----------------|-----------------|-----------------|
| C    | 0.927757194600  | -0.099364818000 | -0.970519529800 |
| C    | 0.029270343800  | -0.426602281500 | 0.054406645200  |
| C    | 0.018876083900  | 0.142146363200  | 1.332672570700  |
| C    | 1.178977451400  | 0.572558363900  | 2.008159076800  |
| C    | 2.469171991300  | 0.478539781500  | 1.475137902900  |
| C    | 2.794800405900  | 0.593040763700  | 0.116572417000  |
| H    | 1.064241350700  | -0.816861989300 | -1.788784555300 |
| H    | 0.986266794300  | 0.934913645400  | -1.289583791400 |
| H    | -0.617914894800 | -1.303334034900 | -0.083180855400 |
| H    | -0.856458476900 | -0.046057528600 | 1.963729036700  |
| H    | 1.086075432600  | 0.674689342500  | 3.094806362400  |
| H    | 3.247497207600  | 0.130714976100  | 2.167720241400  |
| H    | 3.752227487700  | 0.179896938200  | -0.223481688000 |
| H    | 2.506258921700  | 1.498470041800  | -0.404859311200 |

**cZc-HT:**  $E(S_0) = -233.400585023787$  hartree,  $\langle S^2 \rangle = 0.000000000000$

| Atom | x               | y               | z               |
|------|-----------------|-----------------|-----------------|
| C    | 0.362278862371  | 0.096914728746  | -1.168635160686 |
| C    | -0.033107722869 | -0.547553875444 | -0.060576651405 |
| C    | 0.166706356812  | -0.132711004174 | 1.337232119046  |
| C    | 1.184551469480  | 0.528094555306  | 1.934877221781  |
| C    | 2.496324923488  | 0.956728544818  | 1.423645500536  |

|   |                 |                 |                 |
|---|-----------------|-----------------|-----------------|
| C | 3.269091170593  | 0.326765847827  | 0.526190778094  |
| H | 0.108426274414  | -0.286013003452 | -2.159983436968 |
| H | 0.946475591300  | 1.018526609715  | -1.118780615233 |
| H | -0.644900067635 | -1.450912046919 | -0.180391748181 |
| H | -0.669513559167 | -0.402292485852 | 1.994311973052  |
| H | 1.023755667993  | 0.785566672205  | 2.989165076655  |
| H | 2.896590048999  | 1.857558999472  | 1.906322675398  |
| H | 4.254160360033  | 0.718797305563  | 0.261919469859  |
| H | 2.943198304187  | -0.591592763310 | 0.032692897674  |

**cZt-HT:**  $E(S_0) = -233.410095333999$  hartree,  $\langle S^2 \rangle = 0.000000000000$

| Atom | x               | y               | z               |
|------|-----------------|-----------------|-----------------|
| C    | 2.477124477498  | 0.674883932373  | 0.094210445496  |
| C    | 1.156775078440  | 0.469976231119  | 0.250980288570  |
| C    | 0.542322606246  | -0.849275490226 | 0.263176088215  |
| C    | -0.781723093864 | -1.137702200760 | 0.307690324208  |
| C    | -1.917846939575 | -0.212313494068 | 0.260443945372  |
| C    | -2.021280023892 | 0.903860199001  | -0.481120651630 |
| H    | 2.905027759116  | 1.679420121731  | 0.116784833198  |
| H    | 3.168346666805  | -0.158457040127 | -0.067265908303 |
| H    | 0.497108754011  | 1.329540092999  | 0.403048781007  |
| H    | 1.240130271927  | -1.694758441755 | 0.279095289138  |
| H    | -1.054213381300 | -2.193779304844 | 0.418926879588  |
| H    | -2.783632993599 | -0.510548971308 | 0.865999300379  |
| H    | -2.922887459309 | 1.520135092141  | -0.446107587542 |
| H    | -1.227266643958 | 1.217440699201  | -1.163266778363 |

**tZt-HT:**  $E(S_0) = -233.415894962494$  hartree,  $\langle S^2 \rangle = 0.000000000000$

| Atom | x               | y               | z               |
|------|-----------------|-----------------|-----------------|
| C    | 2.818129172513  | 0.235210402410  | -0.112360114537 |
| C    | 1.476664305263  | 0.337304198848  | -0.141370942227 |
| C    | 0.580742936644  | -0.674825970119 | 0.393993470094  |
| C    | -0.776549968574 | -0.642241712907 | 0.400454179176  |
| C    | -1.627934467629 | 0.411792462586  | -0.126680725643 |
| C    | -2.972421444489 | 0.374375910265  | -0.084513321185 |
| H    | 3.459562717613  | 1.016635054467  | -0.524876326215 |
| H    | 3.312387133590  | -0.637017509881 | 0.326908754431  |
| H    | 1.029171458557  | 1.229113075058  | -0.591552704716 |
| H    | 1.069182070811  | -1.550843416386 | 0.835656884538  |
| H    | -1.302253540961 | -1.493891158858 | 0.846979772377  |
| H    | -1.142495483751 | 1.281119969595  | -0.581458251988 |
| H    | -3.579503595135 | 1.185752428573  | -0.491192102401 |
| H    | -3.503787391897 | -0.473094784068 | 0.359909802773  |

**TS1:**  $E(S_0) = -233.368601278395$  hartree,  $\langle S^2 \rangle = 0.000000000000$

| Atom | x               | y               | z               |
|------|-----------------|-----------------|-----------------|
| C    | 0.927757194600  | -0.099364818000 | -0.970519529800 |
| C    | 0.029270343800  | -0.426602281500 | 0.054406645200  |
| C    | 0.018876083900  | 0.142146363200  | 1.332672570700  |
| C    | 1.178977451400  | 0.572558363900  | 2.008159076800  |
| C    | 2.469171991300  | 0.478539781500  | 1.475137902900  |
| C    | 2.794800405900  | 0.593040763700  | 0.116572417000  |
| H    | 1.064241350700  | -0.816861989300 | -1.788784555300 |
| H    | 0.986266794300  | 0.934913645400  | -1.289583791400 |
| H    | -0.617914894800 | -1.303334034900 | -0.083180855400 |
| H    | -0.856458476900 | -0.046057528600 | 1.963729036700  |
| H    | 1.086075432600  | 0.674689342500  | 3.094806362400  |
| H    | 3.247497207600  | 0.130714976100  | 2.167720241400  |
| H    | 3.752227487700  | 0.179896938200  | -0.223481688000 |
| H    | 2.506258921700  | 1.498470041800  | -0.404859311200 |

**Table S2.** Cartesian coordinates (in Å) of the key structures, **CHD**, **TS2**, **cEc-HT**, **cEt-HT**, and **tEt-HT**, in the conrotatory reaction pathway. **TS2** is the conrotatory transition state which connects two equilibrium structures **CHD** and **cEc-HT** by the intrinsic reaction coordinate (IRC). The IRC was computed at B3LYP-D3/cc-pVDZ level of theory. <sup>a</sup>This geometry came from the end point of the conrotatory IRC, and this structure is identical to **CHD** structure in the disrotatory IRC listed in Table S1.

**CHD**<sup>a</sup>: E(S<sub>0</sub>) = -233.438398194973 hartree, <S<sup>2</sup>> = 0.000000000000

| Atom | x               | y               | z               |
|------|-----------------|-----------------|-----------------|
| C    | 0.261582208255  | 0.722570680709  | -1.177508889835 |
| C    | -0.044289810589 | 1.426505026367  | 0.125092736558  |
| C    | -0.098445417215 | 0.727625047253  | 1.274711578166  |
| C    | 0.098561088662  | -0.727636814610 | 1.274722640416  |
| C    | 0.044431702498  | -1.426510987740 | 0.125108194683  |
| C    | -0.261522907746 | -0.722593620780 | -1.177472796535 |
| H    | -0.153371468794 | 1.277879321471  | -2.033791338752 |
| H    | 1.363012189048  | 0.717837990616  | -1.317166556300 |
| H    | -0.153901365517 | 2.514718532942  | 0.126700325801  |
| H    | -0.267635456876 | 1.234571658028  | 2.228693907453  |
| H    | 0.267966755408  | -1.234554280620 | 2.228694182766  |
| H    | 0.153984818871  | -2.514705424486 | 0.126671763660  |
| H    | -1.362971320065 | -0.717831614525 | -1.316983445955 |
| H    | 0.153324437487  | -1.277953134127 | -2.033764182555 |

**TS2**: E(S<sub>0</sub>) = -233.315028022028 hartree, <S<sup>2</sup>> = 0.000000000000

| Atom | x               | y               | z               |
|------|-----------------|-----------------|-----------------|
| C    | 0.725004425500  | 1.072256195300  | -1.017455631200 |
| C    | 0.014355905200  | 1.526951794300  | 0.120236010900  |
| C    | -0.321075740200 | 0.653620412100  | 1.137339253500  |
| C    | 0.321075749600  | -0.653620425100 | 1.137339302800  |
| C    | -0.014355928600 | -1.526951786800 | 0.120236043600  |
| C    | -0.725004322900 | -1.072256081600 | -1.017455717500 |
| H    | 0.767084376900  | 1.713644270700  | -1.902766699900 |
| H    | 1.460812722800  | 0.274629205000  | -0.961437505900 |
| H    | -0.543547996100 | 2.466219249200  | 0.031820097900  |
| H    | -1.294333667100 | 0.788887110000  | 1.625071498700  |
| H    | 1.294333720400  | -0.788887172300 | 1.625071478600  |
| H    | 0.543547865400  | -2.466219332600 | 0.031820119200  |
| H    | -1.460812635100 | -0.274629080600 | -0.961437563900 |
| H    | -0.767084475900 | -1.713644357600 | -1.902766686700 |

**cEc-HT**: E(S<sub>0</sub>) = -233.407463518297 hartree, <S<sup>2</sup>> = 0.000000000000

| Atom | x               | y              | z               |
|------|-----------------|----------------|-----------------|
| C    | 1.352112888585  | 2.312445303562 | -0.294194832370 |
| C    | 0.164747032164  | 1.931507130936 | 0.207922584055  |
| C    | -0.367784609555 | 0.567593205834 | 0.233591188057  |

|   |                 |                 |                 |
|---|-----------------|-----------------|-----------------|
| C | 0.367754170603  | -0.567592759622 | 0.233599995669  |
| C | -0.164758151773 | -1.931499801966 | 0.207789272769  |
| C | -1.352061803843 | -2.312433430950 | -0.294466017271 |
| H | 1.677472831004  | 3.354090692781  | -0.246576441741 |
| H | 2.027630686731  | 1.600580887976  | -0.777085298607 |
| H | -0.492884901479 | 2.702097961452  | 0.627794878982  |
| H | -1.458611810135 | 0.480296010320  | 0.294427308125  |
| H | 1.458572824972  | -0.480281125287 | 0.294617215555  |
| H | 0.492845176147  | -2.702098098783 | 0.627671486830  |
| H | -2.027531151523 | -1.600577709989 | -0.777430963633 |
| H | -1.677356467916 | -3.354115007147 | -0.247073473287 |

**cEt-HT:** E(S<sub>0</sub>) = -233.413038669106 hartree, <S<sup>2</sup>> = 0.000000000000

| Atom | x               | y               | z               |
|------|-----------------|-----------------|-----------------|
| C    | 1.438726002599  | 2.299528490643  | -0.128450192038 |
| C    | 0.159615884279  | 1.903144394611  | -0.006621391804 |
| C    | -0.311982144523 | 0.550475892074  | 0.293926697377  |
| C    | 0.381312560272  | -0.598753926982 | 0.118279644236  |
| C    | -0.132393028310 | -1.914112474254 | 0.454197590299  |
| C    | 0.547058139769  | -3.062296167014 | 0.278953184640  |
| H    | 1.686402814876  | 3.334694291952  | -0.373051096735 |
| H    | 2.275200283810  | 1.611366703223  | 0.022602699122  |
| H    | -0.627504410772 | 2.657509010787  | -0.122415797551 |
| H    | -1.335326236772 | 0.477055407084  | 0.681499458212  |
| H    | 1.387845580459  | -0.560637734350 | -0.315020085312 |
| H    | -1.143065113986 | -1.949548662492 | 0.879273780339  |
| H    | 1.557821430594  | -3.065574647141 | -0.140469354482 |
| H    | 0.116282655448  | -4.028339730247 | 0.550004100685  |

**tEt-HT:** E(S<sub>0</sub>) = -233.418652857267 hartree, <S<sup>2</sup>> = 0.000000000000

| Atom | x               | y               | z               |
|------|-----------------|-----------------|-----------------|
| C    | -0.327211843317 | 3.054940267588  | 0.445989274926  |
| C    | -0.124063921762 | 1.863023598482  | -0.144598473114 |
| C    | -0.115042959967 | 0.591857340609  | 0.555406717372  |
| C    | 0.089885664033  | -0.606188973372 | -0.042446483162 |
| C    | 0.099104964815  | -1.877307245124 | 0.657646118595  |
| C    | 0.302275222984  | -3.069277177655 | 0.067146827861  |
| H    | -0.324153410834 | 3.984414582151  | -0.126971212759 |
| H    | -0.502929544945 | 3.132203254976  | 1.523371586183  |
| H    | 0.048744431637  | 1.824537980862  | -1.227142747392 |
| H    | -0.286831461705 | 0.622118878172  | 1.638816957173  |
| H    | 0.262041071435  | -0.636389513665 | -1.125848716692 |
| H    | -0.073170405552 | -1.838675607770 | 1.740262744515  |
| H    | 0.477255607177  | -3.146732349332 | -1.010329720149 |
| H    | 0.299489739982  | -3.998660201568 | 0.640254041765  |





**Table S3.** Cartesian coordinates (in Å) of **CHD cation** in the cationic ground state. This geometry was optimized at B3LYP-D3/cc-pVDZ level of theory.

**CHD cation:**  $E(D_0) = -233.146342193951$  hartree,  $\langle S^2 \rangle = 0.750025495088$

| Atom | x               | y               | z               |
|------|-----------------|-----------------|-----------------|
| C    | 0.079449382100  | 0.764067259800  | -1.216813910200 |
| C    | -0.024506760400 | 1.416245446000  | 0.105659638600  |
| C    | -0.033443653500 | 0.707768520500  | 1.300652978400  |
| C    | 0.033443653500  | -0.707768520500 | 1.300652978400  |
| C    | 0.024506760400  | -1.416245446000 | 0.105659638600  |
| C    | -0.079449382100 | -0.764067259800 | -1.216813910200 |
| H    | -0.617778734100 | 1.251543194400  | -1.922404662700 |
| H    | 1.075498204900  | 1.055830482800  | -1.620292351400 |
| H    | -0.052528339300 | 2.510223784000  | 0.135701051500  |
| H    | -0.078068162200 | 1.245604195100  | 2.250304255900  |
| H    | 0.078068162200  | -1.245604195200 | 2.250304255900  |
| H    | 0.052528339400  | -2.510223784000 | 0.135701051400  |
| H    | -1.075498204900 | -1.055830482800 | -1.620292351400 |
| H    | 0.617778734000  | -1.251543194400 | -1.922404662800 |

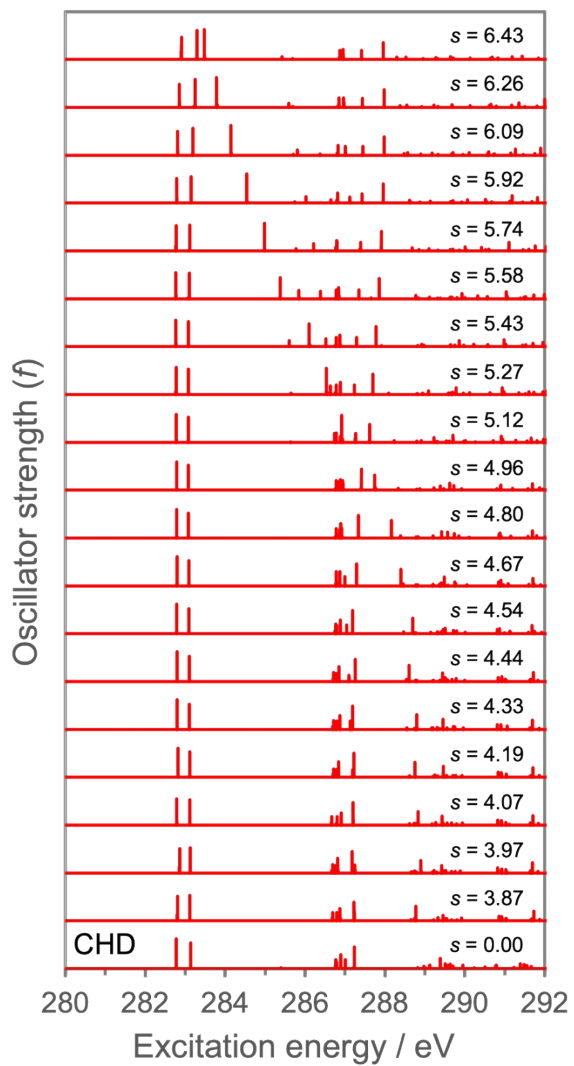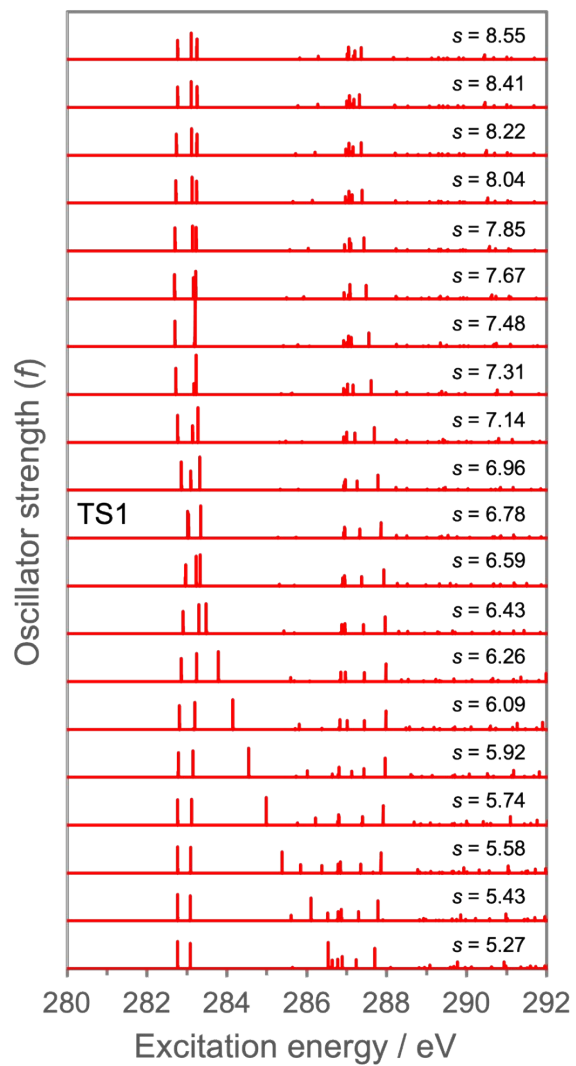

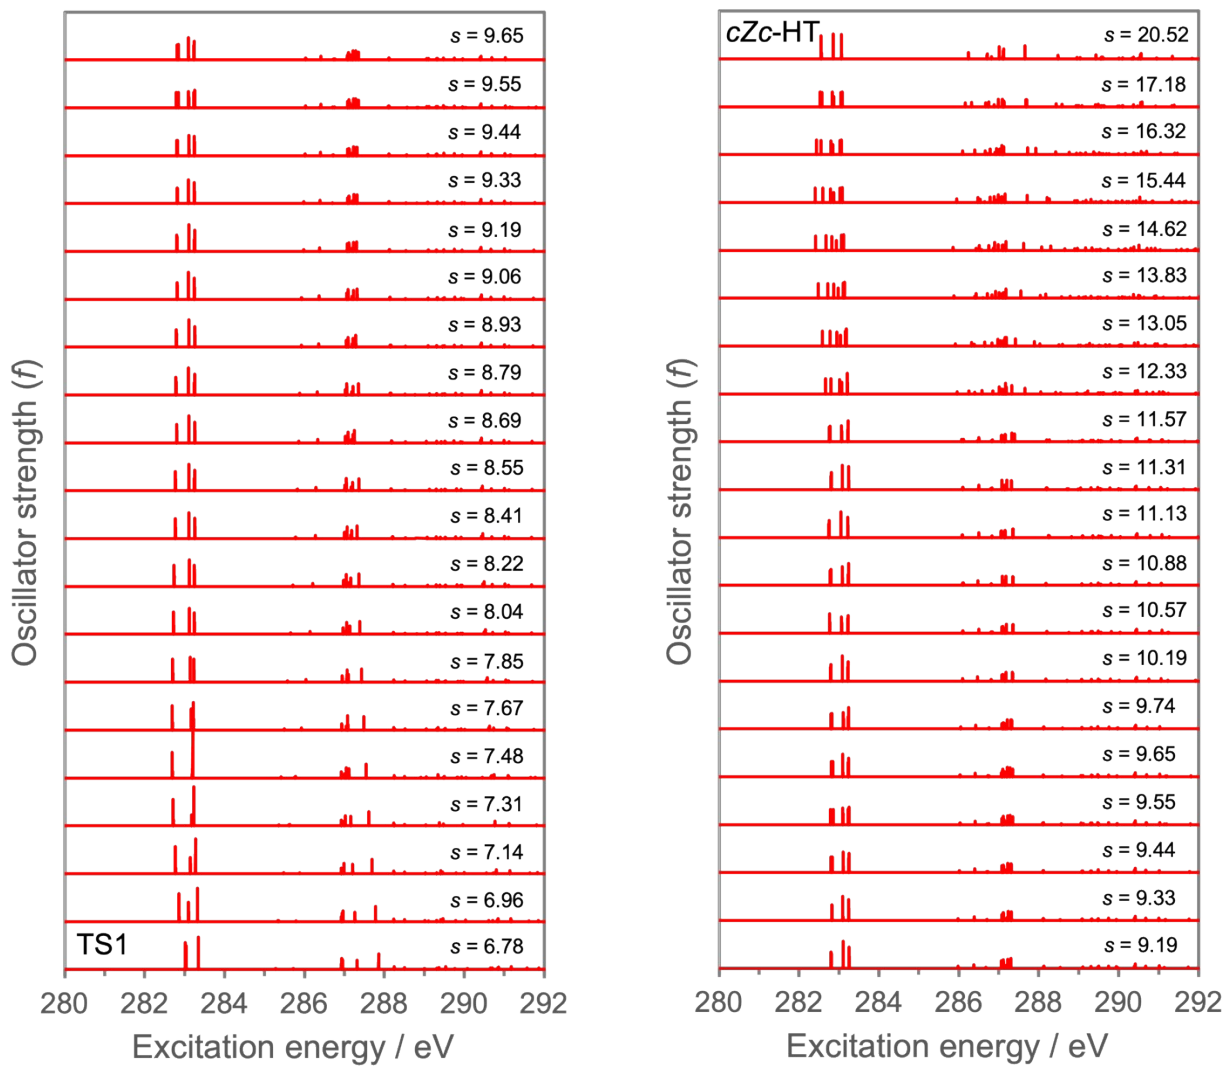

**Fig. S4.** Computed absorption spectra along the disrotatory pathway. The value  $s$  stands for the reaction coordinate [ $\text{\AA} \text{amu}^{1/2}$ ] where  $s = 0$  corresponds to CHD (see **Figs. 5a** and **6a**).

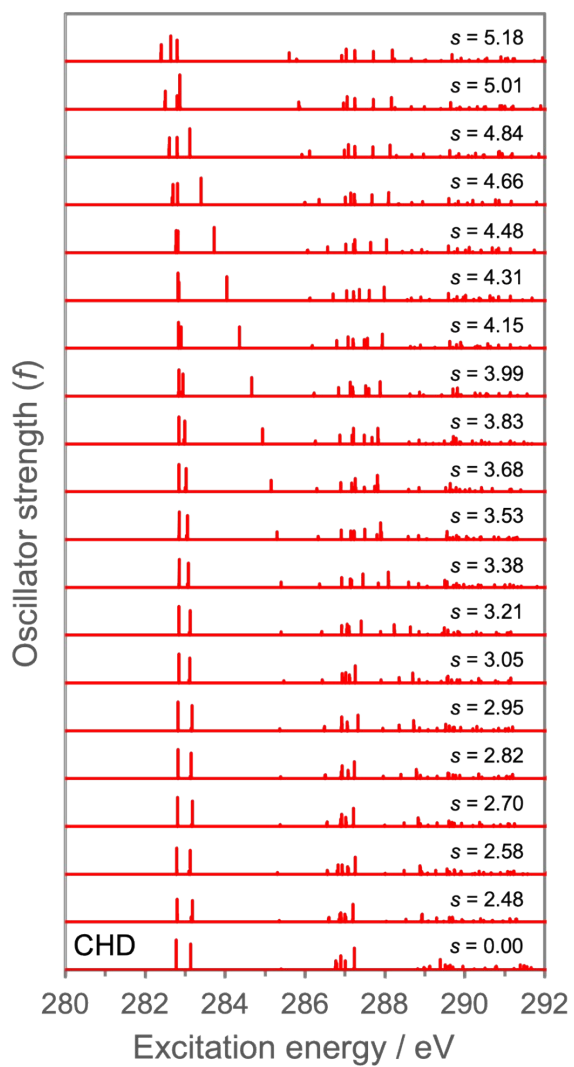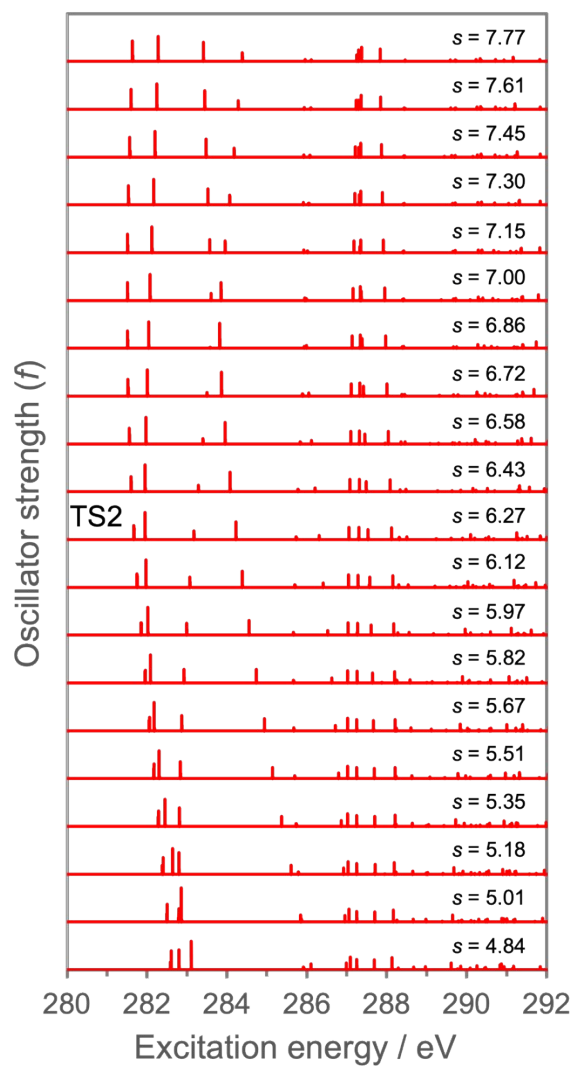

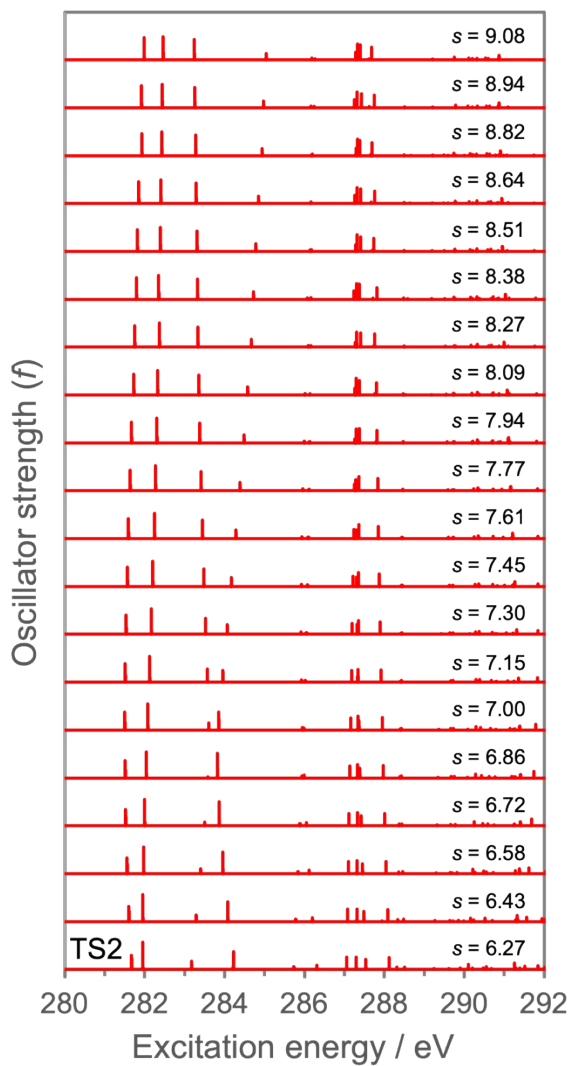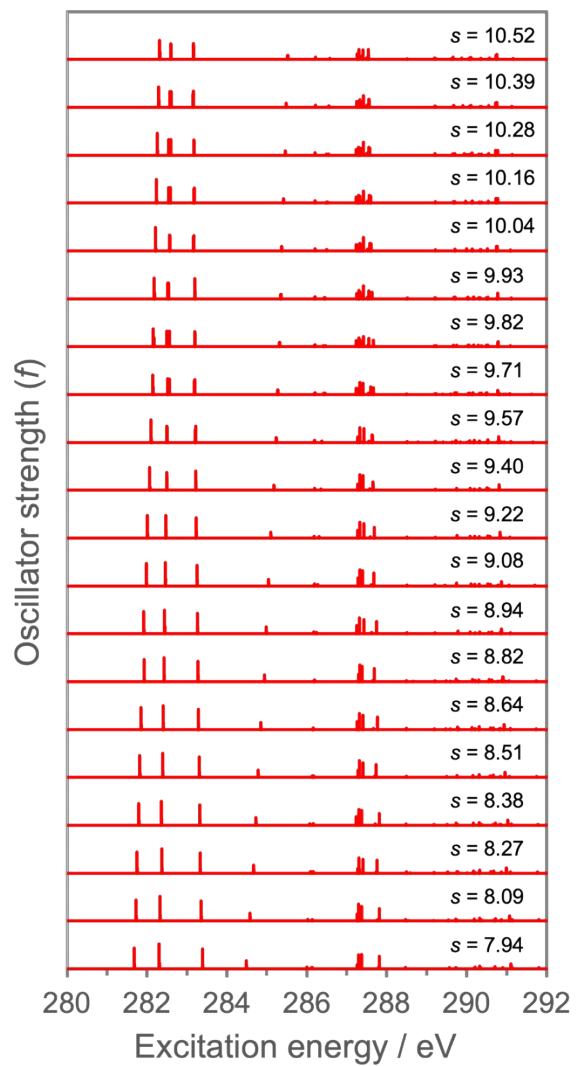

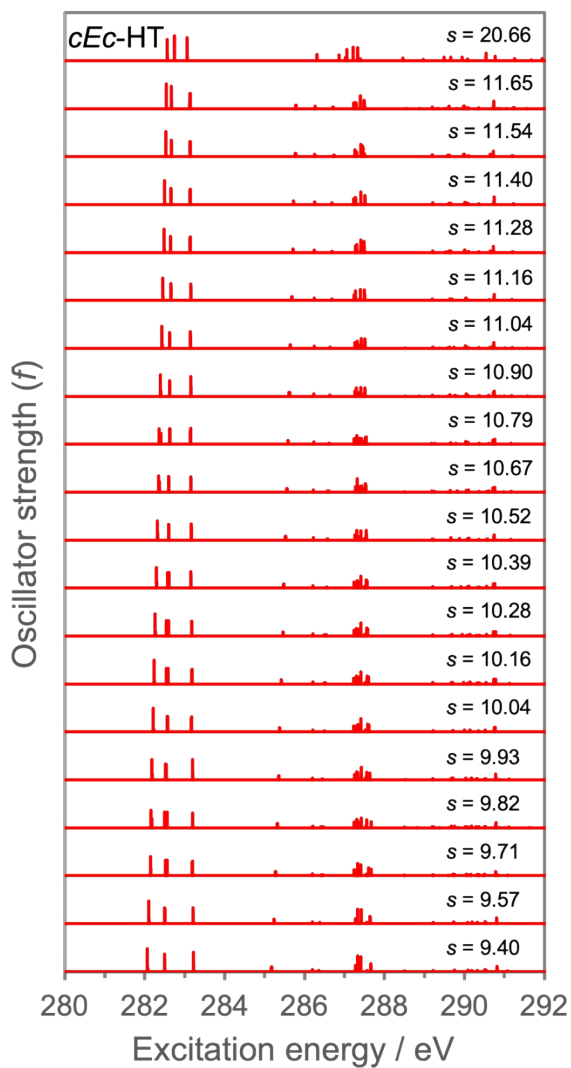

**Fig. S5.** Computed absorption spectra along the conrotatory pathway. The value  $s$  stands for the reaction coordinate [ $\text{\AA} \text{amu}^{1/2}$ ] where  $s = 0$  corresponds to CHD (see **Figs. 5b** and **6b**).

**Table S4.** List of excited states with the oscillator strength  $f$  greater than 0.1 in the region of the peak X (core excitation energy  $\omega_i = 280\text{--}285$  eV) of the five key structures of the neutral state, **CHD**, **cZc-HT**, **cEc-HT**, **TS1**, and **TS2**, computed at TD-BHLYP/cc-pCVDZ level of theory.

| Structure     | State | $\omega_i$ / eV | $f$    | Primary excitation                                  | Coeff.  |
|---------------|-------|-----------------|--------|-----------------------------------------------------|---------|
| <b>CHD</b>    | 1634  | 282.7688        | 0.1255 | $3a \rightarrow 23a$ ( $C_{1s} \rightarrow \pi^*$ ) | 0.62428 |
|               | 1636  | 283.1304        | 0.1071 | $5a \rightarrow 23a$ ( $C_{1s} \rightarrow \pi^*$ ) | 0.60812 |
| <b>TS1</b>    | 1633  | 283.0102        | 0.1118 | $1a \rightarrow 24a$ ( $C_{1s} \rightarrow \pi^*$ ) | 0.55988 |
|               | 1635  | 283.0319        | 0.0478 | $6a \rightarrow 23a$ ( $C_{1s} \rightarrow \pi^*$ ) | 0.50121 |
|               | 1636  | 283.0361        | 0.0997 | $5a \rightarrow 23a$ ( $C_{1s} \rightarrow \pi^*$ ) | 0.48712 |
|               | 1638  | 283.3448        | 0.1351 | $4a \rightarrow 24a$ ( $C_{1s} \rightarrow \pi^*$ ) | 0.49740 |
| <b>cZc-HT</b> | 1633  | 282.5548        | 0.0958 | $5a \rightarrow 23a$ ( $C_{1s} \rightarrow \pi^*$ ) | 0.54782 |
|               | 1634  | 282.5562        | 0.0248 | $6a \rightarrow 23a$ ( $C_{1s} \rightarrow \pi^*$ ) | 0.54788 |
|               | 1635  | 282.8526        | 0.1032 | $4a \rightarrow 23a$ ( $C_{1s} \rightarrow \pi^*$ ) | 0.49214 |
|               | 1637  | 283.0629        | 0.0209 | $3a \rightarrow 23a$ ( $C_{1s} \rightarrow \pi^*$ ) | 0.51551 |
|               | 1638  | 283.0636        | 0.1014 | $2a \rightarrow 23a$ ( $C_{1s} \rightarrow \pi^*$ ) | 0.42316 |
| <b>TS2</b>    | 1633  | 281.6656        | 0.0589 | $6a \rightarrow 23a$ ( $C_{1s} \rightarrow \pi^*$ ) | 0.64077 |
|               | 1634  | 281.6763        | 0.0446 | $5a \rightarrow 23a$ ( $C_{1s} \rightarrow \pi^*$ ) | 0.63936 |
|               | 1635  | 281.9497        | 0.1138 | $1a \rightarrow 23a$ ( $C_{1s} \rightarrow \pi^*$ ) | 0.63686 |
|               | 1636  | 281.9565        | 0.0125 | $2a \rightarrow 23a$ ( $C_{1s} \rightarrow \pi^*$ ) | 0.63704 |
|               | 1637  | 283.1704        | 0.0244 | $4a \rightarrow 23a$ ( $C_{1s} \rightarrow \pi^*$ ) | 0.59745 |
|               | 1638  | 283.1704        | 0.0350 | $3a \rightarrow 23a$ ( $C_{1s} \rightarrow \pi^*$ ) | 0.59648 |
|               | 1639  | 284.2208        | 0.0136 | $3a \rightarrow 24a$ ( $C_{1s} \rightarrow \pi^*$ ) | 0.46426 |
|               | 1640  | 284.2210        | 0.0744 | $4a \rightarrow 24a$ ( $C_{1s} \rightarrow \pi^*$ ) | 0.46508 |
| <b>cEc-HT</b> | 1633  | 282.5665        | 0.0308 | $6a \rightarrow 23a$ ( $C_{1s} \rightarrow \pi^*$ ) | 0.56751 |
|               | 1634  | 282.5668        | 0.0881 | $5a \rightarrow 23a$ ( $C_{1s} \rightarrow \pi^*$ ) | 0.56745 |
|               | 1635  | 282.7384        | 0.1046 | $4a \rightarrow 23a$ ( $C_{1s} \rightarrow \pi^*$ ) | 0.63838 |
|               | 1637  | 283.0629        | 0.0228 | $1a \rightarrow 23a$ ( $C_{1s} \rightarrow \pi^*$ ) | 0.52848 |
|               | 1638  | 283.0639        | 0.0963 | $2a \rightarrow 23a$ ( $C_{1s} \rightarrow \pi^*$ ) | 0.53418 |



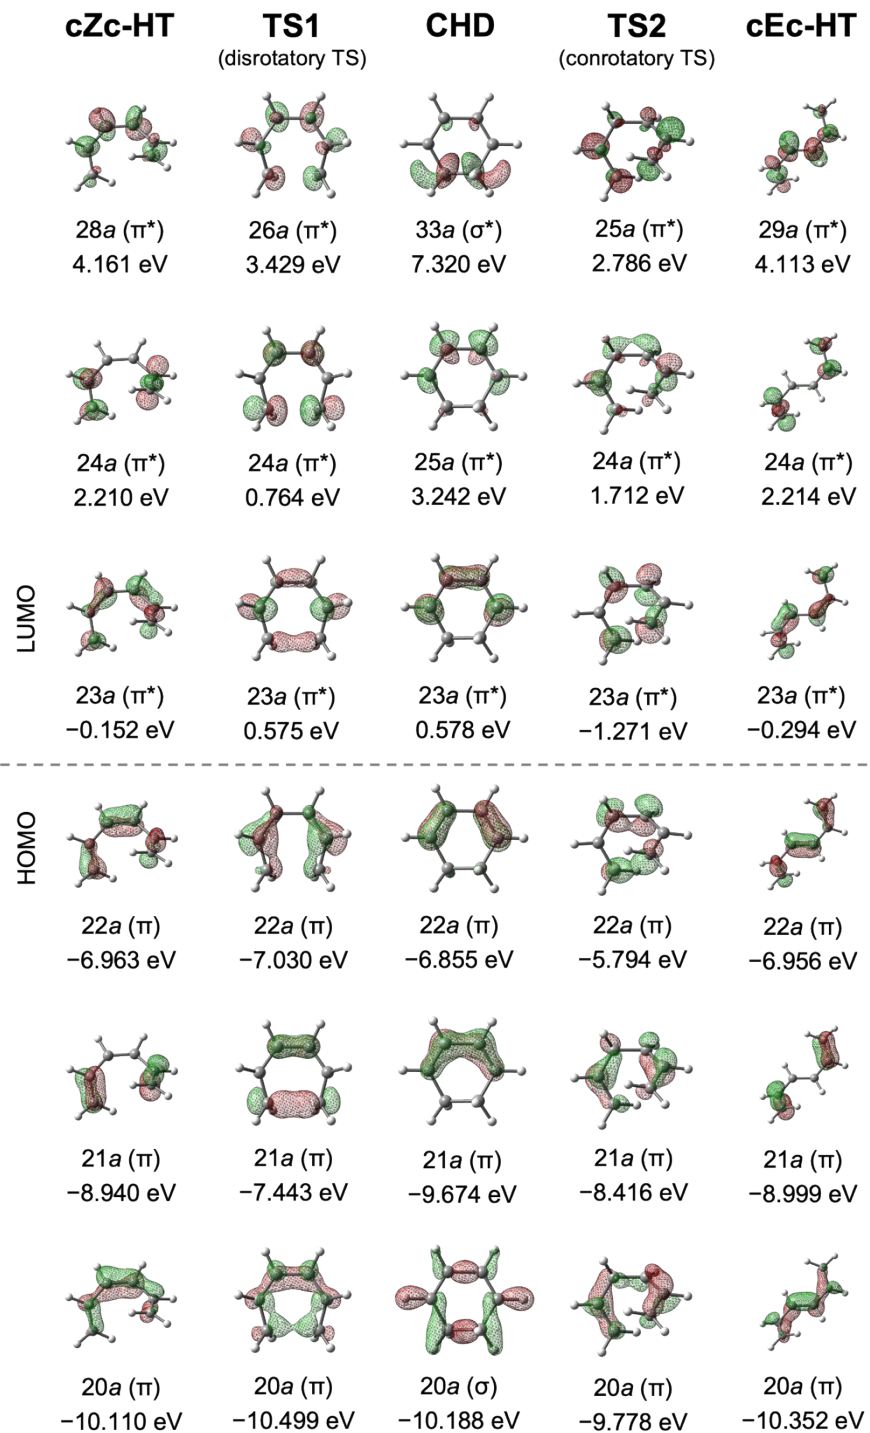

**Fig. S6.** Low-lying valence (occupied and virtual) molecular orbitals of the five key structures of the neutral state, **CHD**, **cZc-HT**, **cEc-HT**, **TS1**, and **TS2**, computed at BHHLYP/cc-pCVDZ level of theory. The character and orbital energy of each MO are also indicated.

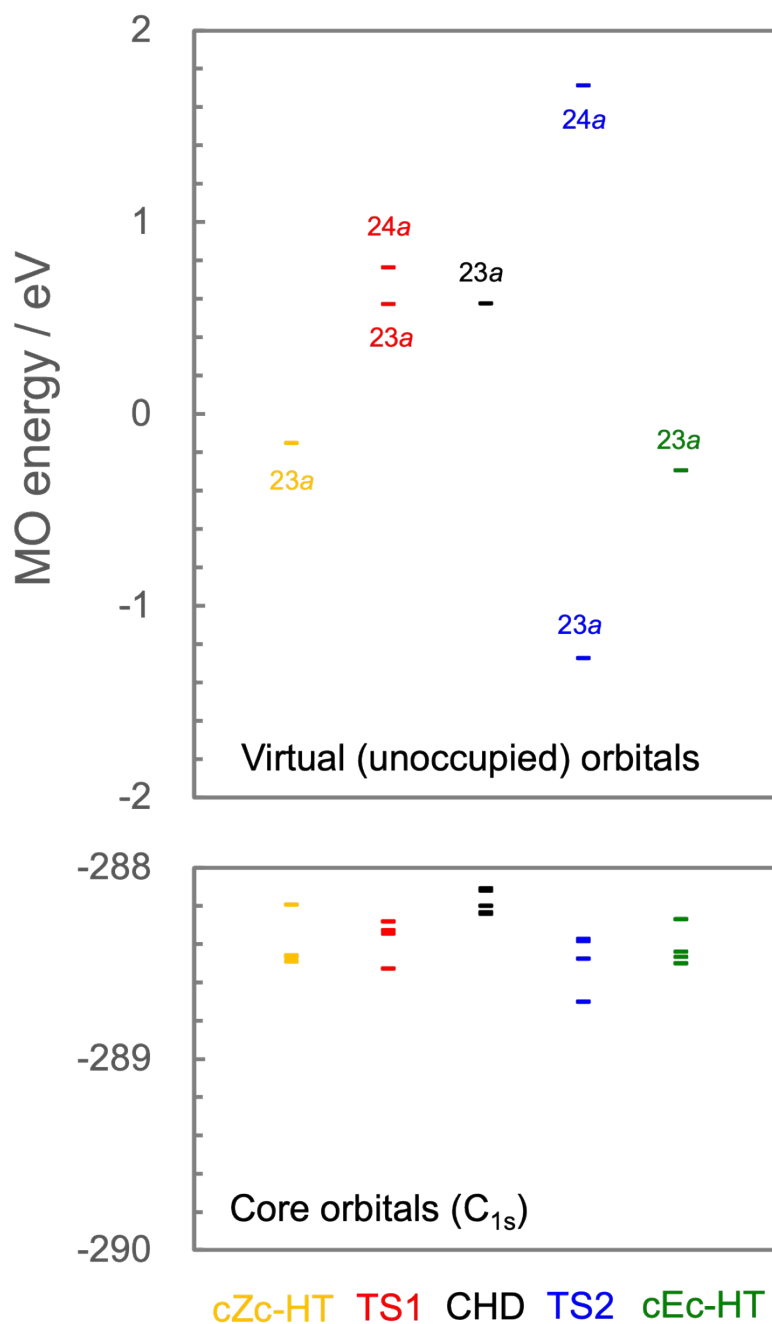

**Fig. S7.** Energies of the molecular orbitals which are related to the excitations listed in **Table S4**, computed at BHHLYP/cc-pCVDZ level of theory.

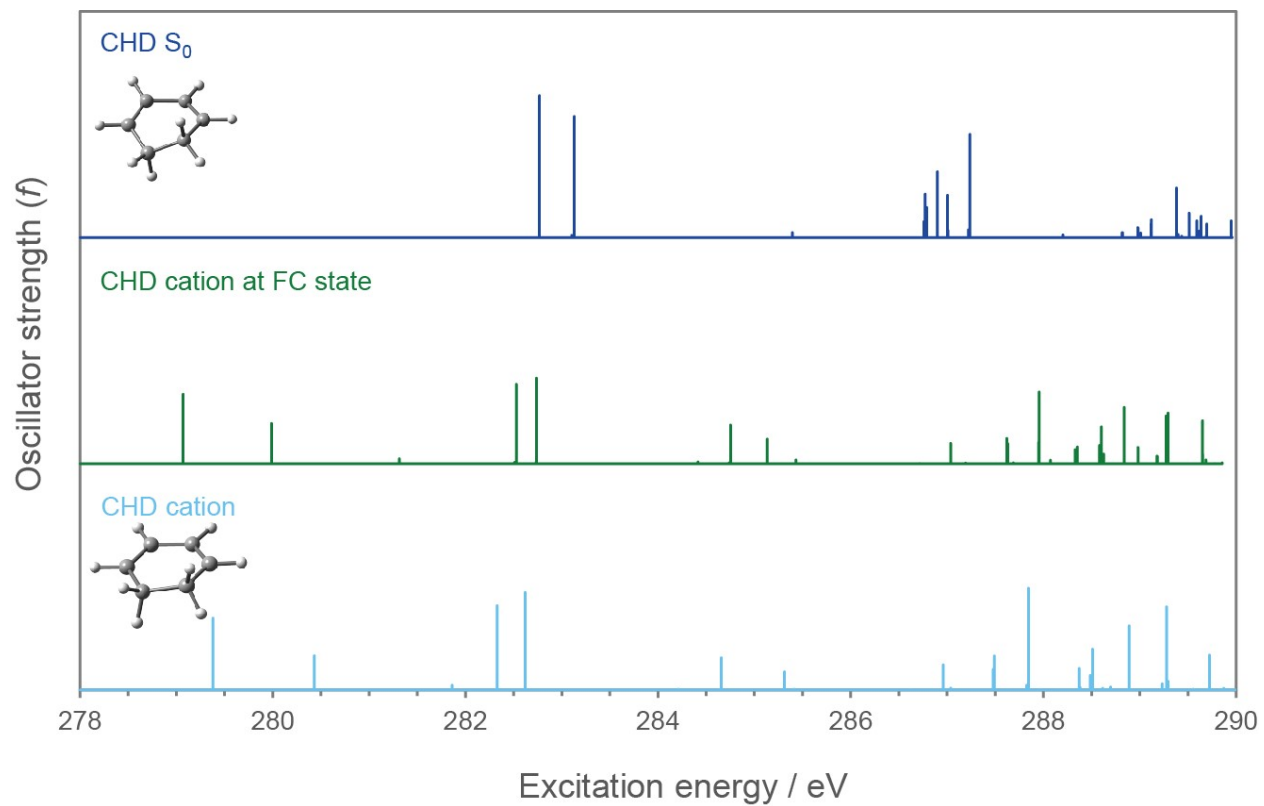

**Fig. S8.** Absorption spectra of **CHD** in the ground state, **CHD cation at FC state**, and the optimized (relaxed) **CHD cation**.
